# Supplementary material for: Highly time-resolved chemical speciation and source apportionment of organic aerosol components in Delhi, India, using extractive electrospray ionization mass spectrometry
Source: Copernicus journal article supplement (doi:10.5194/acp-22-7739-2022), 2022-06-15
Supplement: Supplementary file 1 [file acp-22-7739-2022-supplement.pdf]

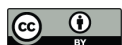

*Supplement of*

**Highly time-resolved chemical speciation and source apportionment of organic aerosol components in Delhi, India, using extractive electrospray ionization mass spectrometry**

**Varun Kumar et al.**

*Correspondence to:* Sachchida N. Tripathi (snt@iitk.ac.in), André S. H. Prévôt (andre.prevot@psi.ch), and Jay G. Slowik (jay.slowik@psi.ch)

The copyright of individual parts of the supplement might differ from the article licence.

## Supplemental information

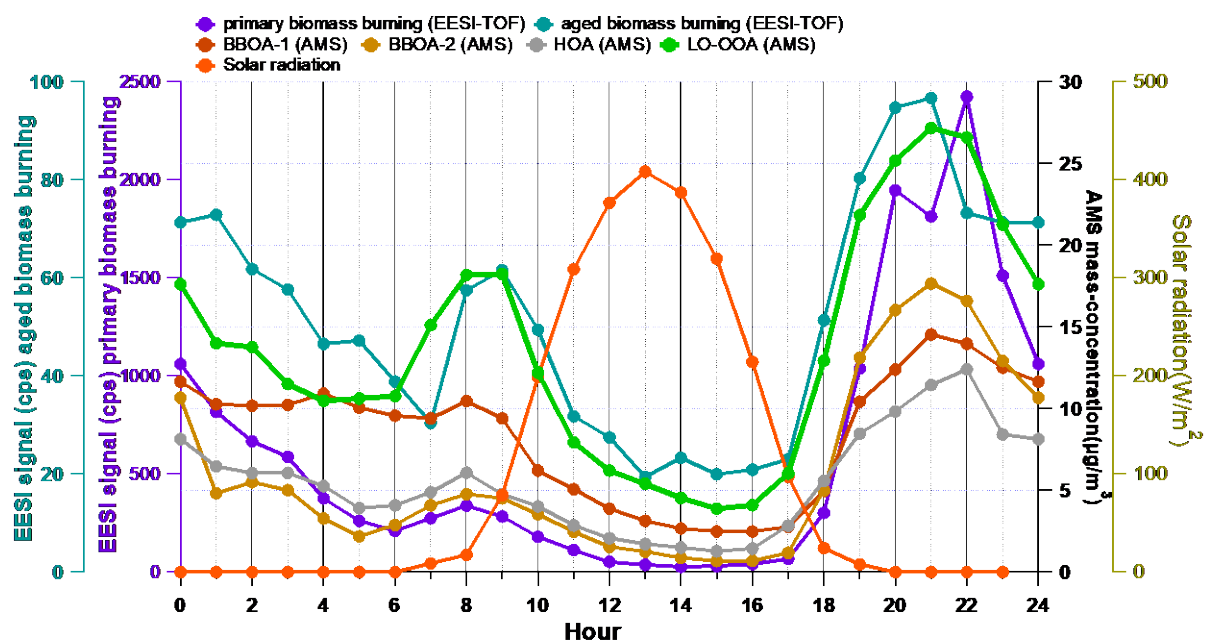

**Figure S1:** Diurnal trends of primary biomass burning and aged biomass burning from EESI-TOF along with BBOA, HOA and LO-OOA factors from AMS. The intensity of solar-radiation is also shown. Please note that the color used to represent primary biomass burning from EESI-TOF is different in this figure than the rest of figures to aid better visualisation.

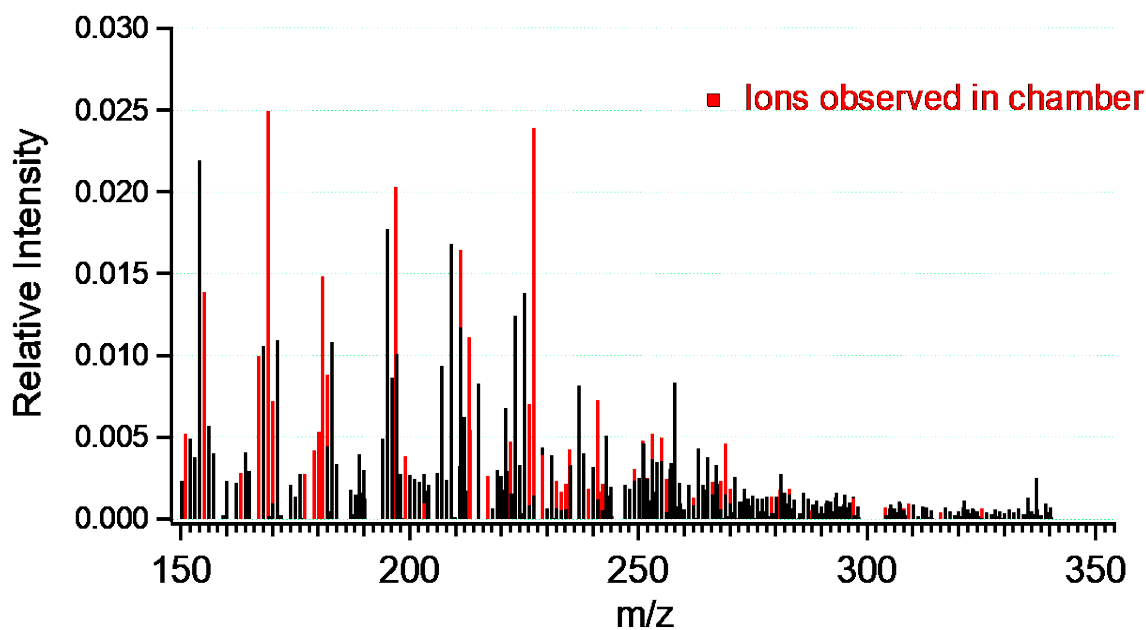

**Figure S2:** (a) Mass spectrum of aromatic SOA color-coded with ions also identified in chamber experiments exploring oxidation of an aromatic mixture by OH radicals.

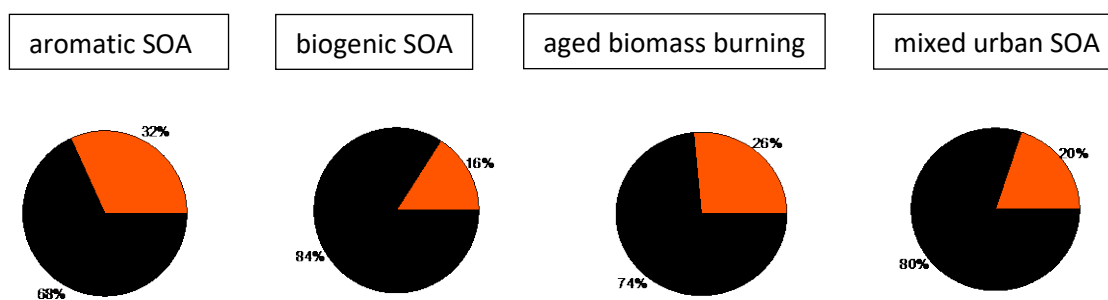

**Figure S2: (b)** Pie charts showing the percentage of total signal of SOA factors that is contributed by ions identified in chamber experiments.

(a)  $C_{18}H_{34}O_2$  (oleic acid)

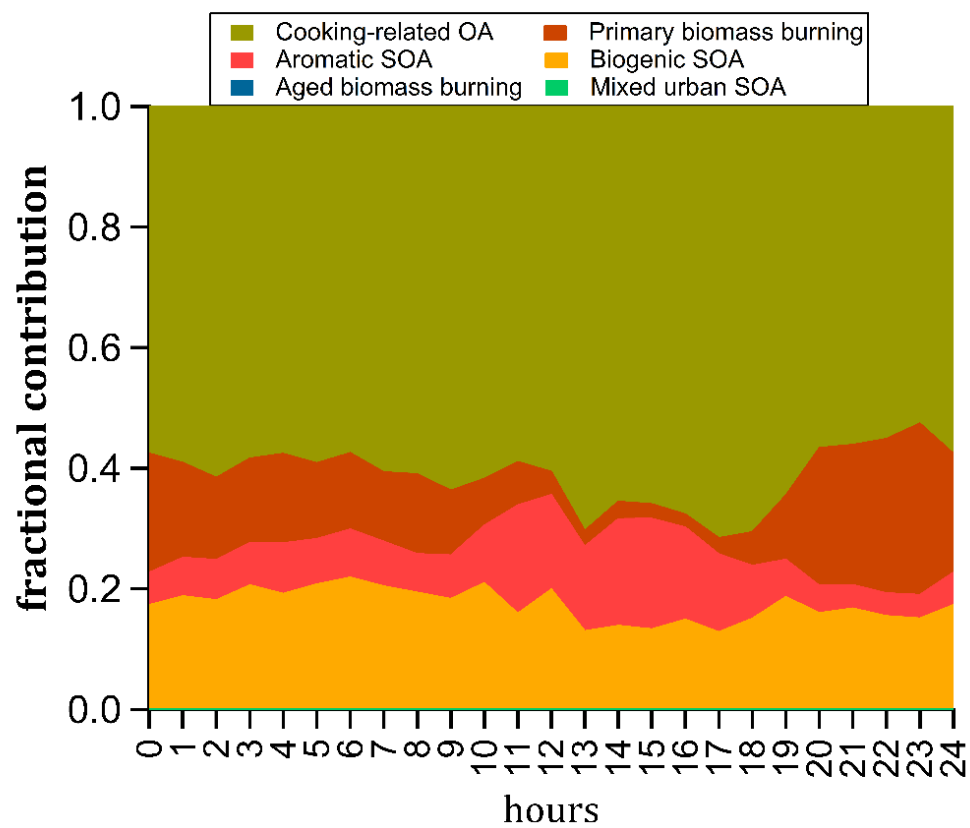

(b)  $C_{16}H_{32}O_2$  (palmitic acid)

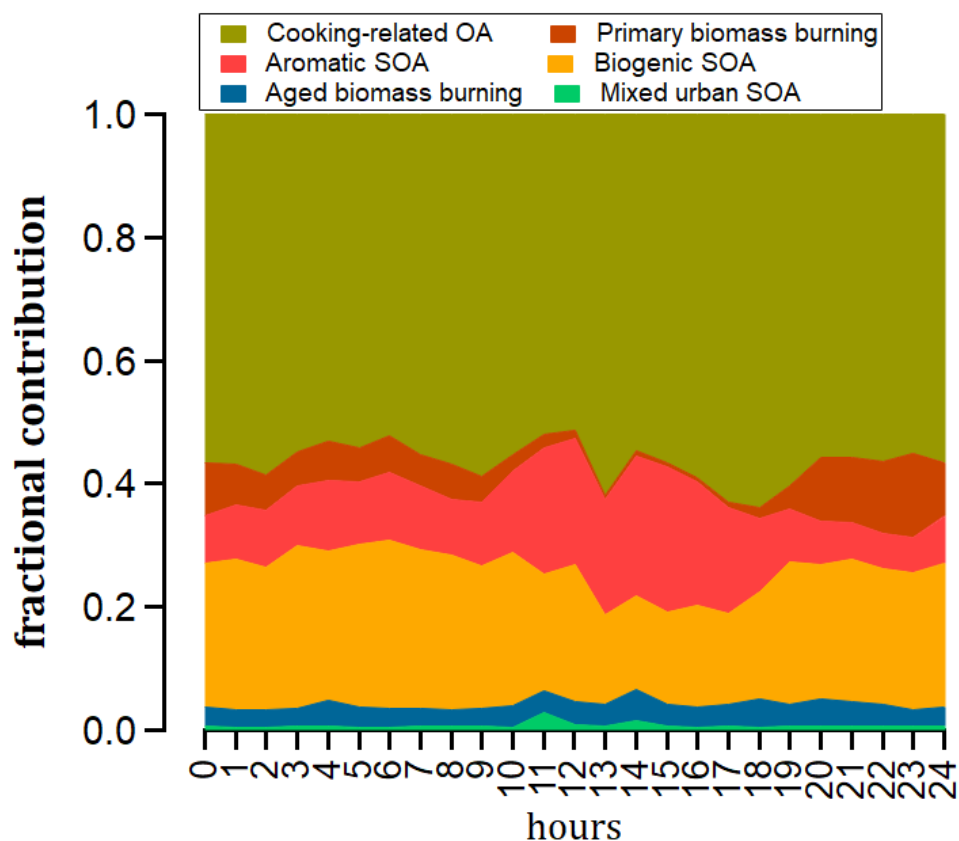

**Figure S3:** Fractional contribution of EESI-TOF factors to the diurnal trend of (a)  $C_{18}H_{34}O_2$  (oleic acid) and (b)  $C_{16}H_{32}O_2$  (palmitic acid). These two compounds have been identified in previous cooking-related OA factors from EESI-TOF studies (Qi et al., 2019; Tong et al., 2021).

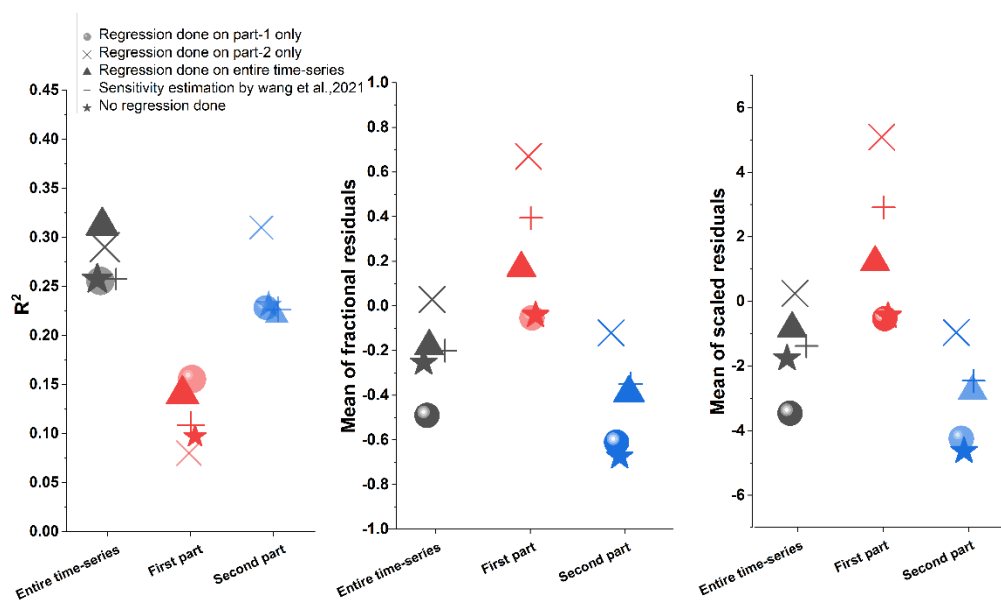

**Figure S4:** Evaluation of different treatments of EESI-TOF SOA factor sensitivities. Shown are Pearson  $R^2$  (left panel), mean of fractional residuals (middle panel), and mean of uncertainty weighted residuals (right panel). Each panel is subdivided into trials on the entire time series, part-1 and part-2. The symbols denote the different strategies applied to calculate coefficients/sensitivities of EESI-TOF SOA factors were estimated.

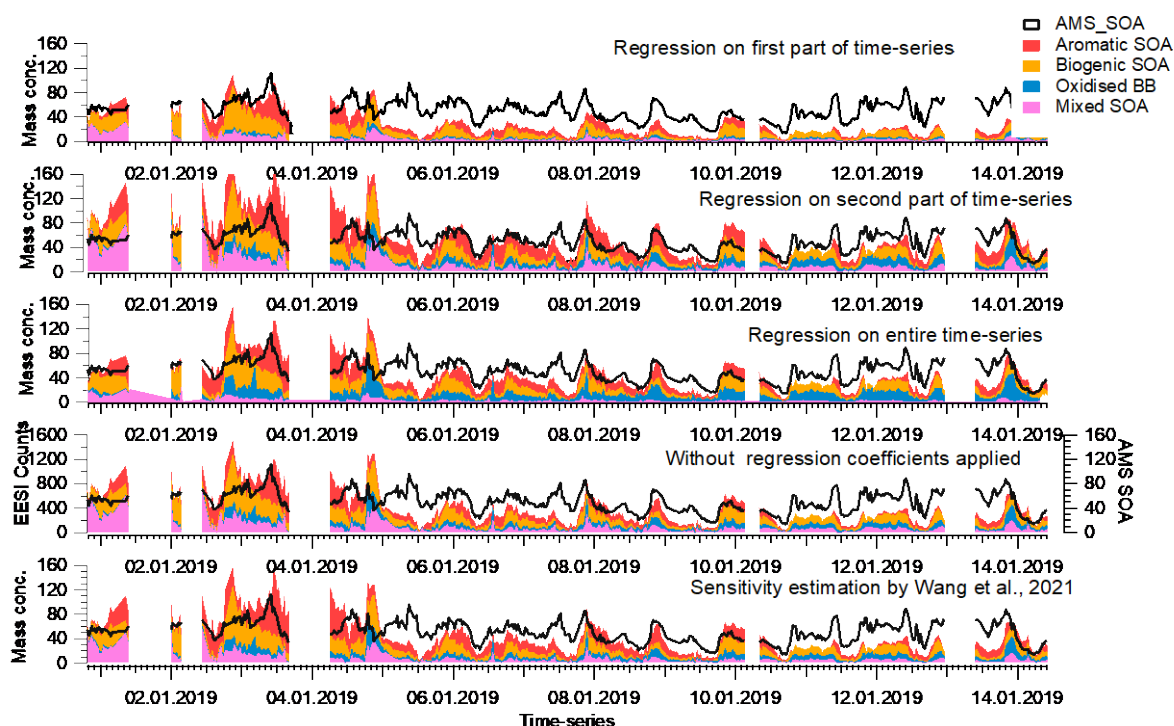

**Figure S5:** Stacked time series of individual SOA factors modelled using response factors obtained by MLR. Different panels show different strategies applied to calculate these response factors. Starting from top: MLR on only first part of time series, MLR on MLR on entire time series, part-1 of time series, part-2 of time series, no response factors applied i.e., applying bulk EESI-TOF sensitivities and response factors obtained using model of (Wang et al., 2021)

| Factor               | $\alpha$ -value range |
|----------------------|-----------------------|
| Cooking-related OA   | 0-0.5                 |
| Aromatic SOA         | 0-0.2                 |
| Biogenic SOA         | 0-0.5                 |
| Aged biomass burning | 0-0.9                 |
| Mixed urban SOA      | 0-0.9                 |

**Table S1:** The  $\alpha$ -value limits used for different factors for the combined bootstrap/ $\alpha$ -value randomization analysis

| Bulk properties   | Aromatic SOA | Biogenic SOA | Aged biomass burning | Mixed urban SOA | Primary biomass burning | Cooking-related OA |
|-------------------|--------------|--------------|----------------------|-----------------|-------------------------|--------------------|
| Average M.W       | 214.363      | 245          | 229                  | 215             | 193                     | 233.9              |
| Bulk oxygen Num   | 4.7733       | 5.05         | 5.68                 | 4.64            | 5.02                    | 4.015              |
| Bulk carbon Num   | 7.96483      | 9.69         | 8.34                 | 8.25            | 6.49                    | 9.482              |
| Bulk hydrogen Num | 11.9221      | 15.3         | 12.1                 | 13              | 10.7                    | 15.47              |
| Bulk nitrogen Num | 0.32652      | 0.27         | 0.13                 | 0.2             | 0.03                    | 0.298              |

**Table S2:** Bulk properties of EESI-TOF factors. These bulk properties represent average mean weight (M.W.) and mean oxygen number, carbon number, hydrogen number and nitrogen number of EESI-TOF factors.
